# Supplementary material for: Factors influencing the efficiency of generating genetically engineered pigs by nuclear transfer: multi-factorial analysis of a large data set
Source: PubMed Central journal article supplement (PMC3691671; doi:10.1186/1472-6750-13-43), 2013-05-20

gen.mod = (1=HR, 2=AGT, 3=replic. of tg pigs)

cell.type = (1=MSC, 2=PF, 3=FF, 4=KC)

clon.rds = (1=1round, 2=2rounds, 3=3rounds)

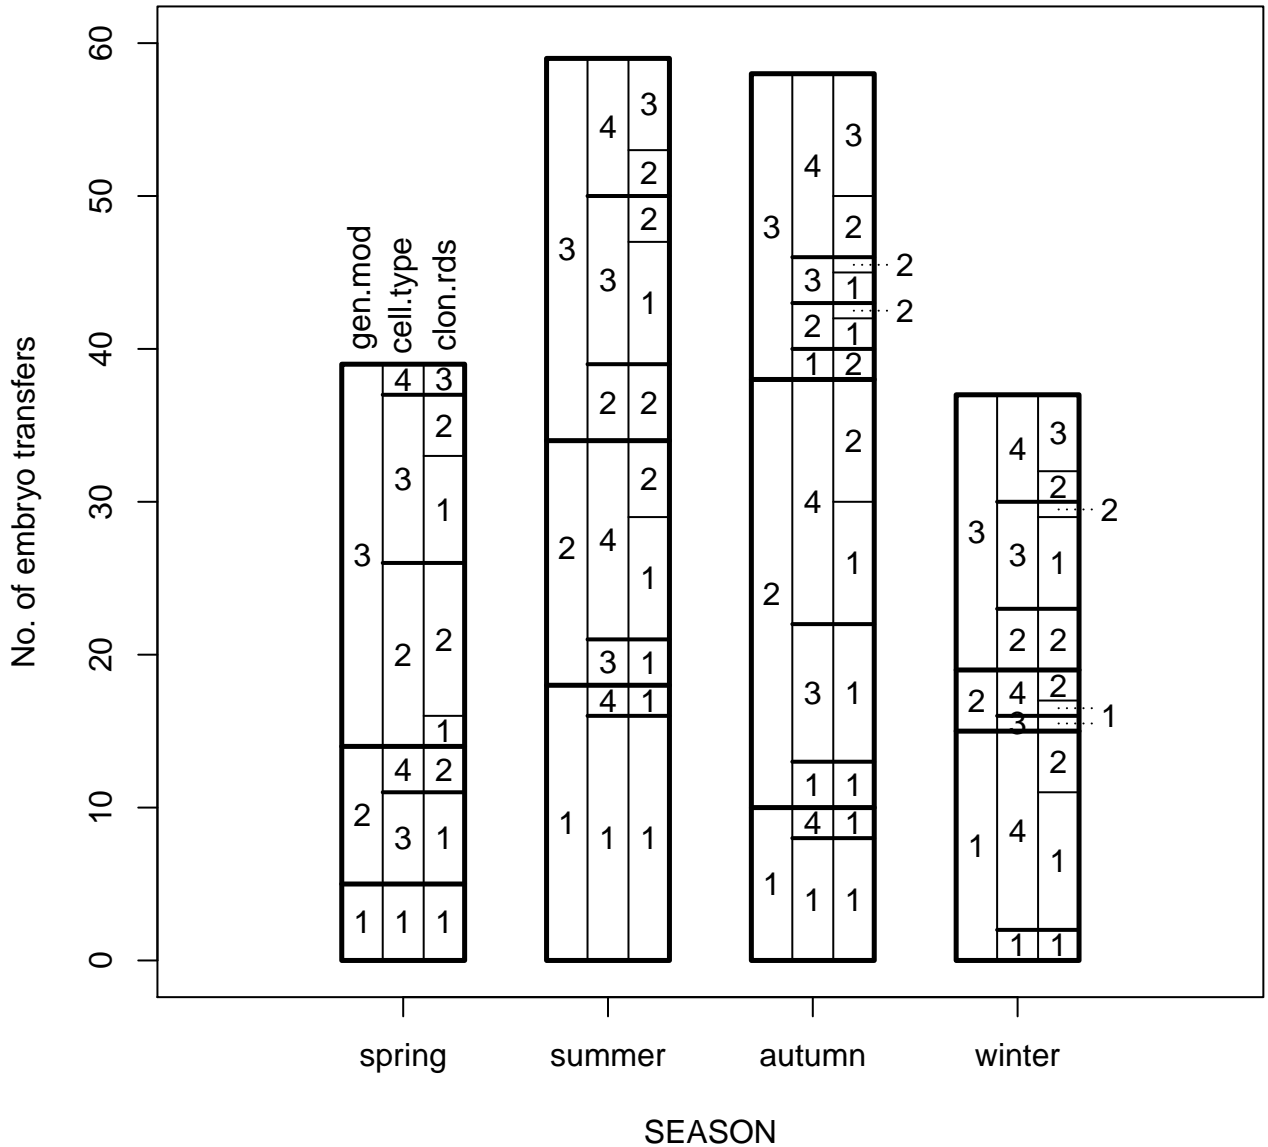

Supplement: 1472-6750-13-43-S3.pdf [file 1472-6750-13-43-S3.pdf]
