# Supplementary material for: Factors influencing the efficiency of generating genetically engineered pigs by nuclear transfer: multi-factorial analysis of a large data set
Source: PubMed Central journal article supplement (PMC3691671; doi:10.1186/1472-6750-13-43), 2013-05-20

Cloning efficiency (%)

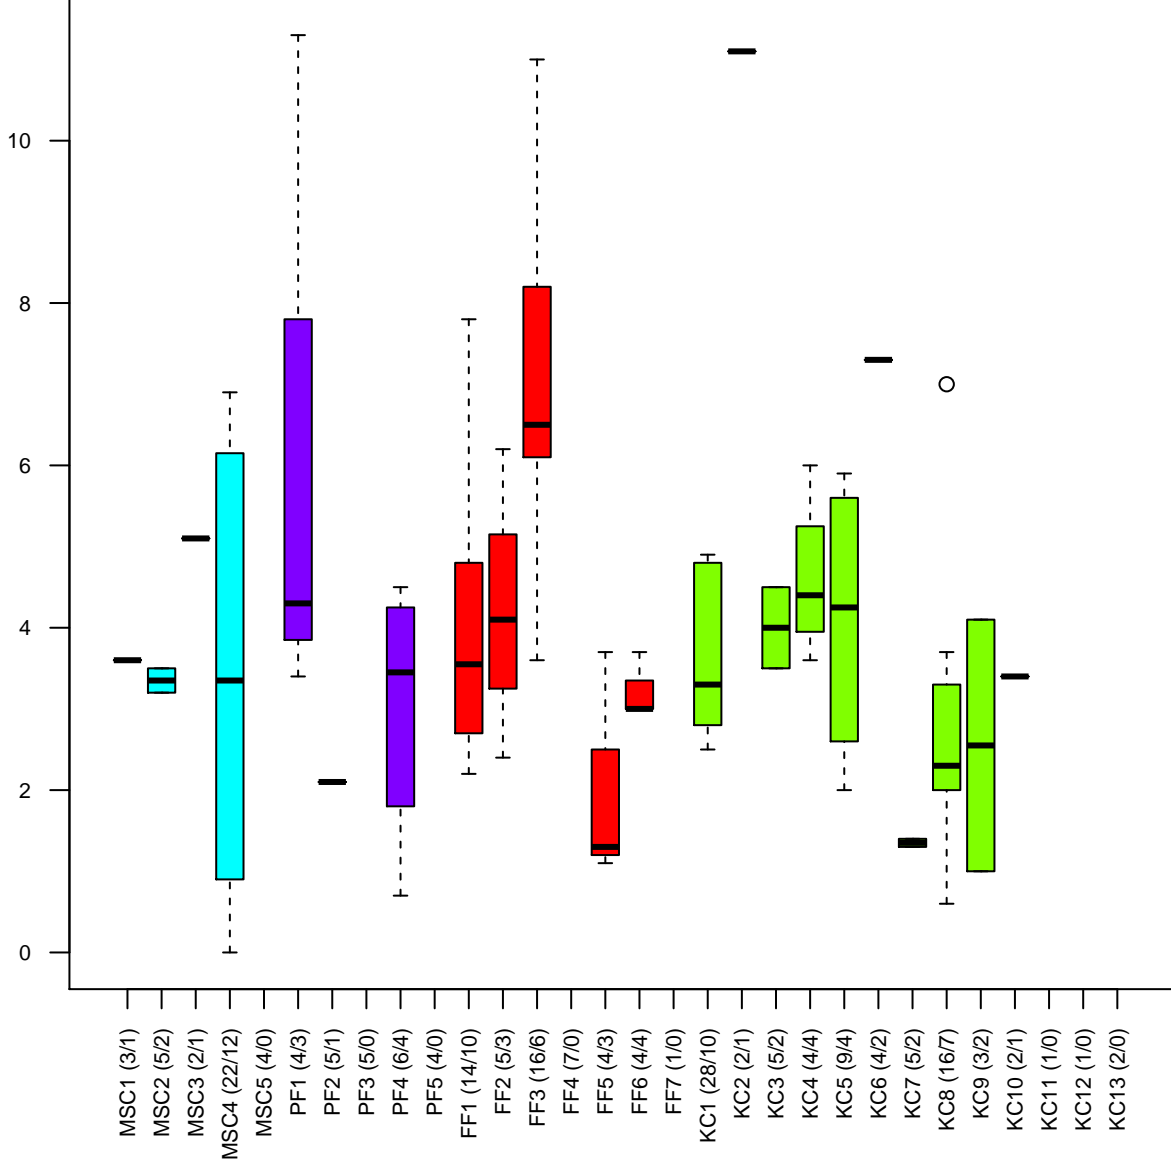

Supplement: 1472-6750-13-43-S5.pdf [file 1472-6750-13-43-S5.pdf]
